# Supplementary material
Source: Springer Nature journal article supplement (https://www.springermedizin.de/resource/supplementary/12931_2010_1050_MOESM3_ESM.pdf/9425528)

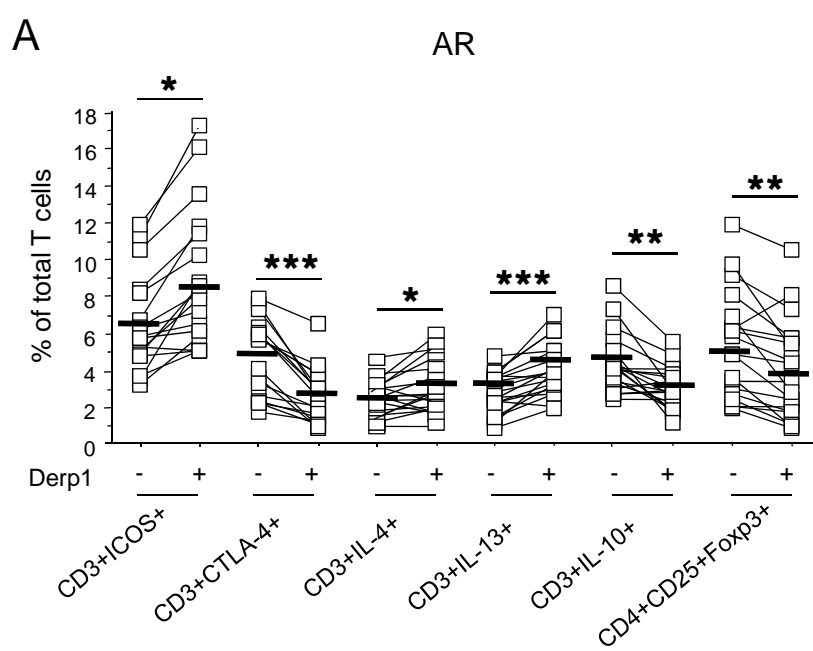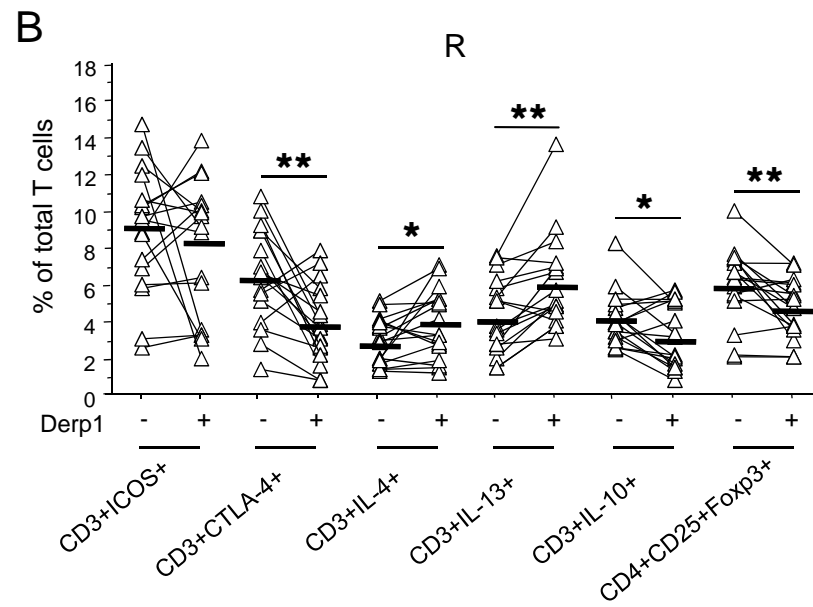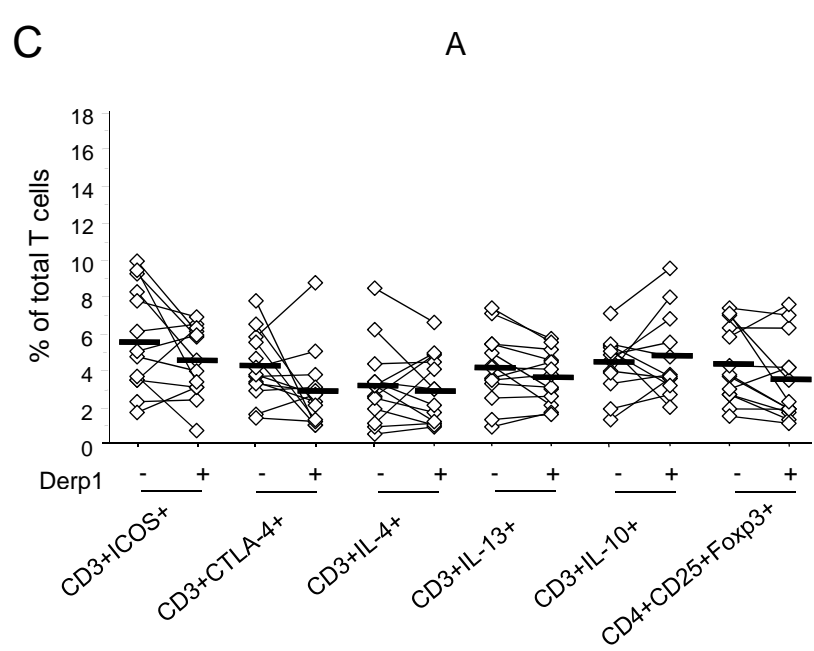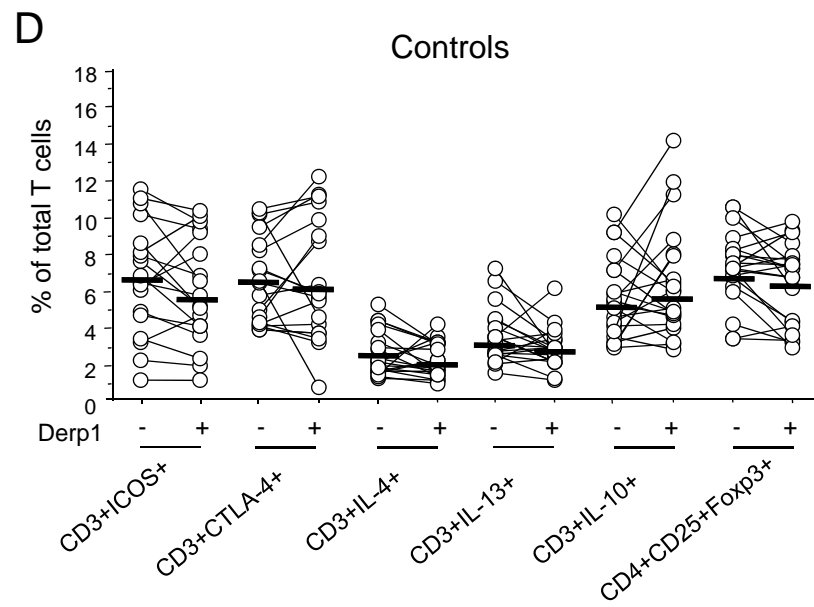

Supplement: MOESM3 [file 9425528]
